# Supplementary material for: Chemical and Laser Cleaning of Corrosion Encrustations on Historical Stained Glass: A Comparative Study
Source: MDPI journal article supplement (doi:10.3390/heritage6020104), 2023-02-14
Supplement: s1 [file s1]

## Supplementary material

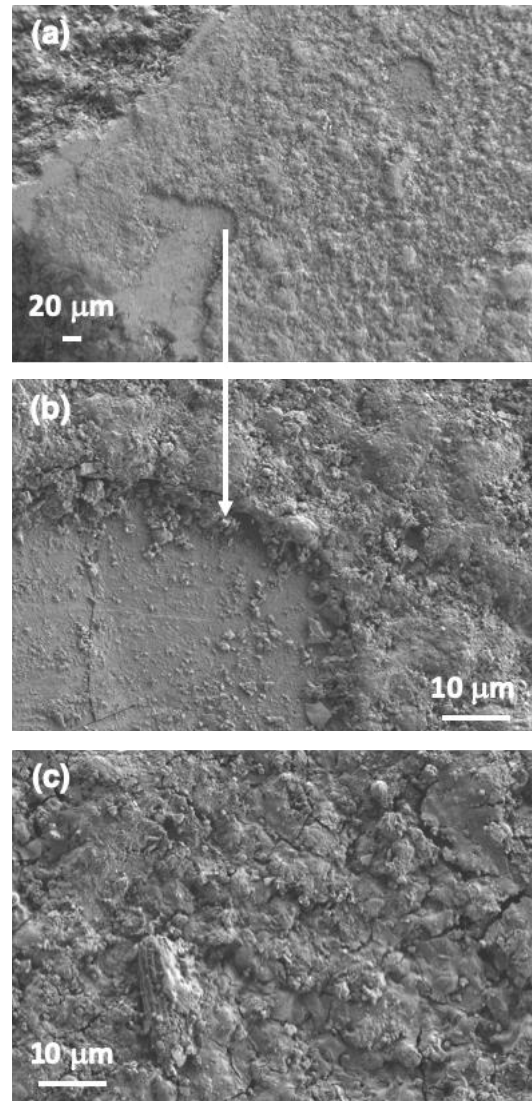

**Figure S1.** FESEM micrographs of (a) glass surface covered with the crust layer; (b) a detail of the glass surface showing some cracks generated on the glass; and (c) detail of the crust layer showing the cracks generated on it.
