# Supplementary material for: Chemical and Laser Cleaning of Corrosion Encrustations on Historical Stained Glass: A Comparative Study
Source: MDPI journal article supplement (doi:10.3390/heritage6020104), 2023-02-14
Supplement: s1 [file s1]

Archive with 1 entries (1 files):
- heritage-2228488-supplementary.pdf
